# Supplementary material for: Symbiotic composite composed of MoS2and pelagic clay with enhanced disinfection efficiency
Source: Royal Society of Chemistry journal article supplement (doi:10.1039/d1ra00008j), 2021-01-01
Supplement: d1ra00008j1.pdf [file d1ra00008j1.pdf]

Supporting information for

**Symbiotic composite composed of MoS<sub>2</sub> and pelagic clay with  
enhanced disinfection efficiency**

Qiwei Sun, Yuhua Liu, Zhipeng liu, Guoqing Huang, Shisheng Yuan, Guohua Yang, Kaiwen Wang,

Peiping Zhang\* and Nan Li\*

Key Laboratory of Automobile Materials, Ministry of Education, College of Materials Science and  
Engineering, Jilin University, 2699 Qianjin Street, Changchun 130012, P. R. China

\* corresponding authors

Peiping Zhang zhangpp@jlu.edu.cn

Nan Li lin@jlu.edu.cn

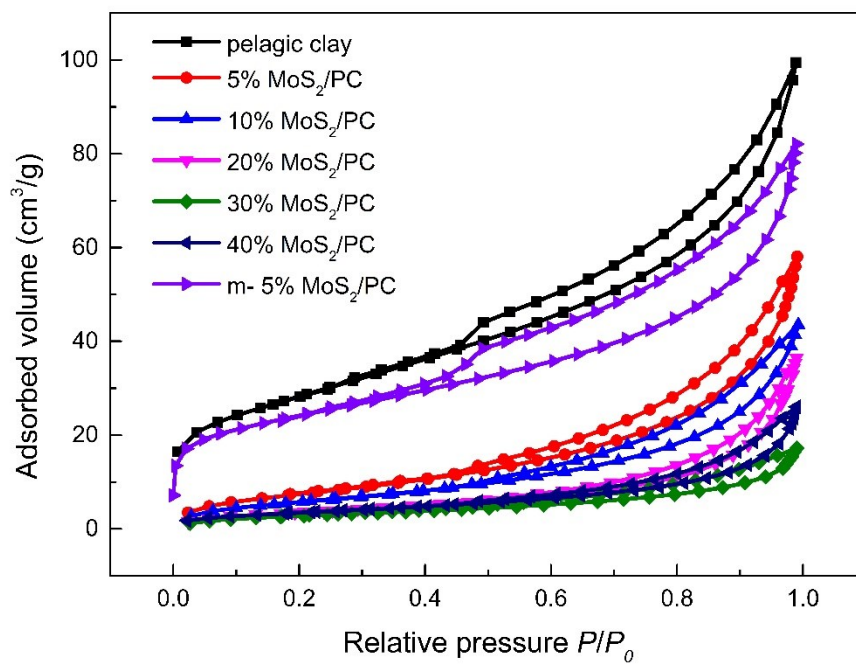

**Fig. S1** N<sub>2</sub> adsorption/desorption isotherm curves of pelagic clay, 5% MoS<sub>2</sub>/PC, 10% MoS<sub>2</sub>/PC, 20% MoS<sub>2</sub>/PC, 30% MoS<sub>2</sub>/PC, 40% MoS<sub>2</sub>/PC and m- 5% MoS<sub>2</sub>/PC.

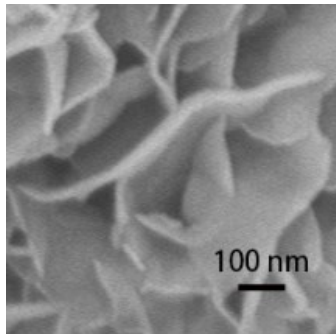

**Fig. S2** SEM image of bulk MoS<sub>2</sub>.
